# Supplementary material for: Fingerprint of Characteristic Saffron Compounds as Novel Standardization of Commercial Crocus sativus Extracts
Source: MDPI journal article supplement (doi:10.3390/foods12081634), 2023-04-13
Supplement: s1 [file s1]

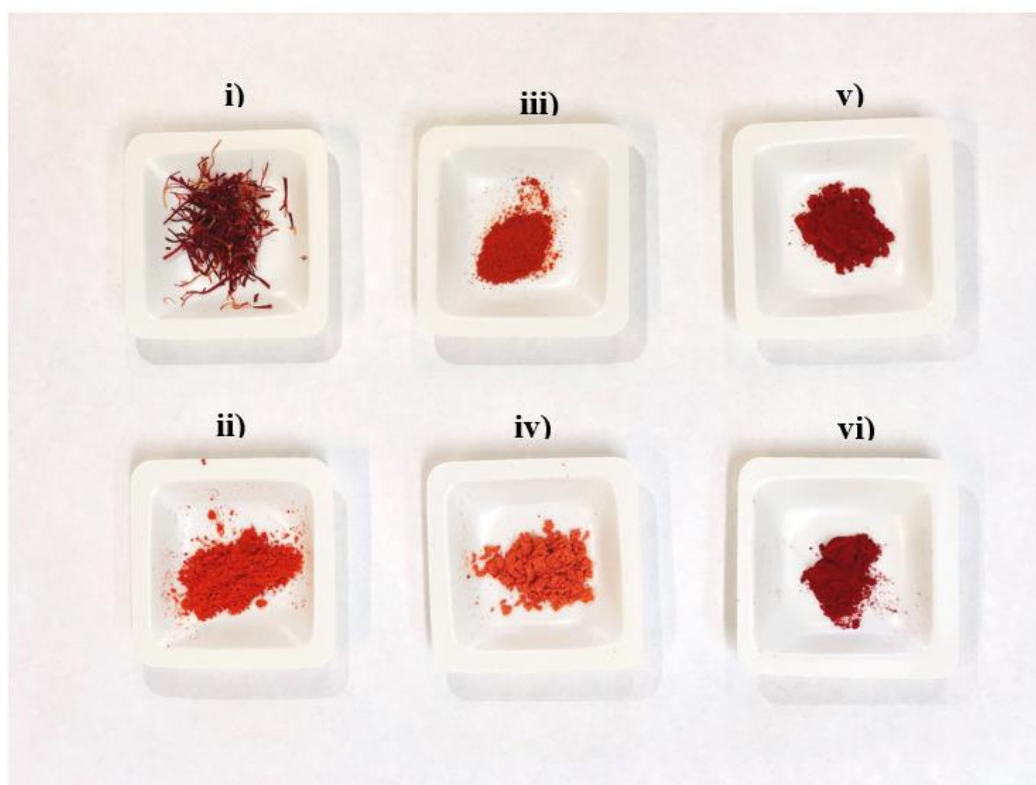

**Figure S1.** Picture of some saffron samples analyzed in this study: i) saffron stigma SS1, ii) grounded saffron stigma SS1, iii) affron® saffron extract SE1, iv) saffron commercial extract SE20, v) saffron commercial extract SE14, vi) gardenia extract GE1.

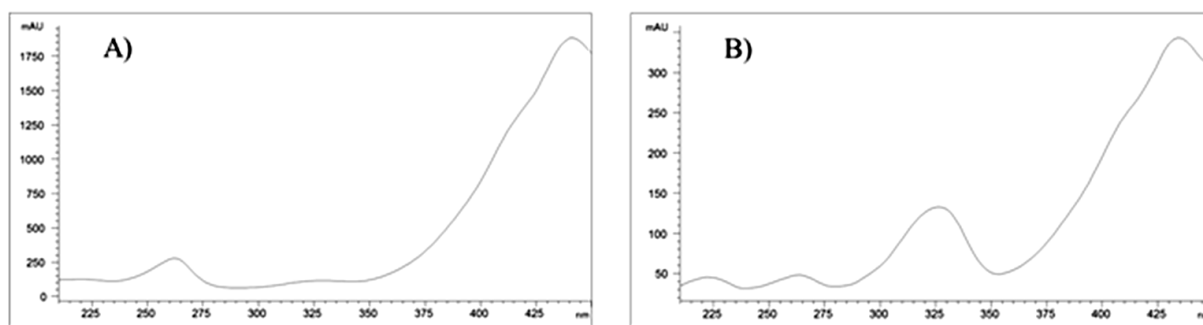

**Figure S2.** Typical UV absorption for *trans*-crocins (A) and *cis*-crocins (B).

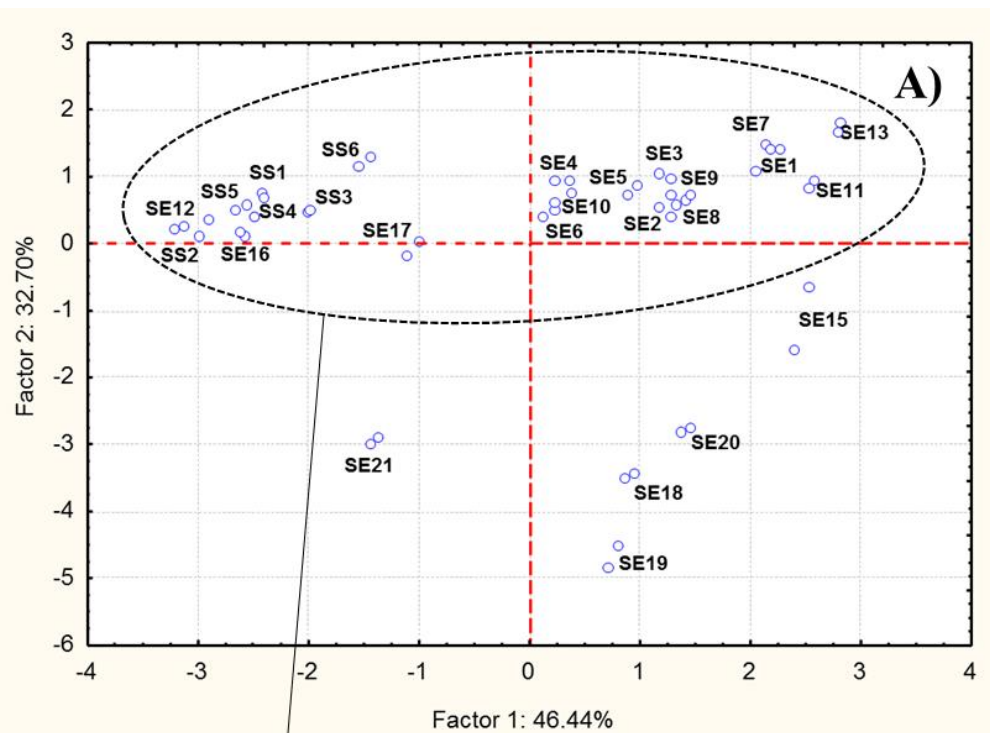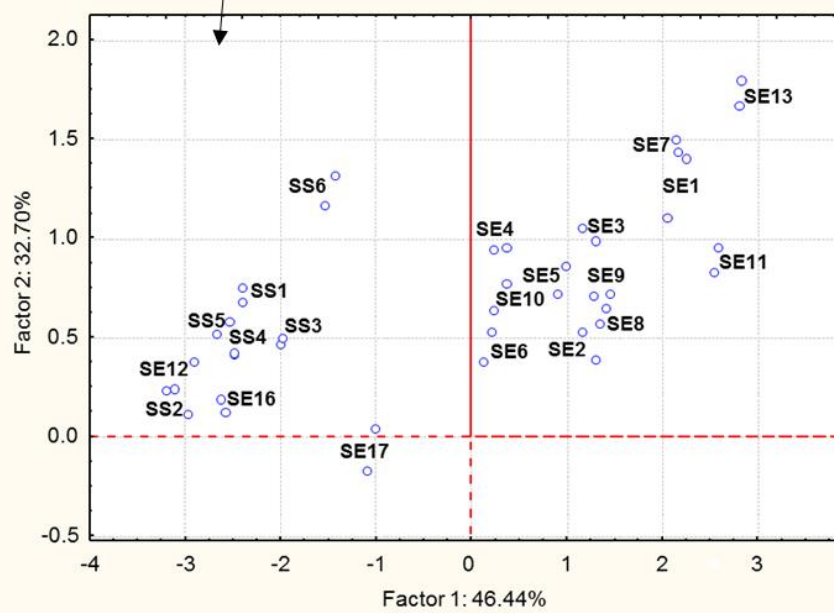

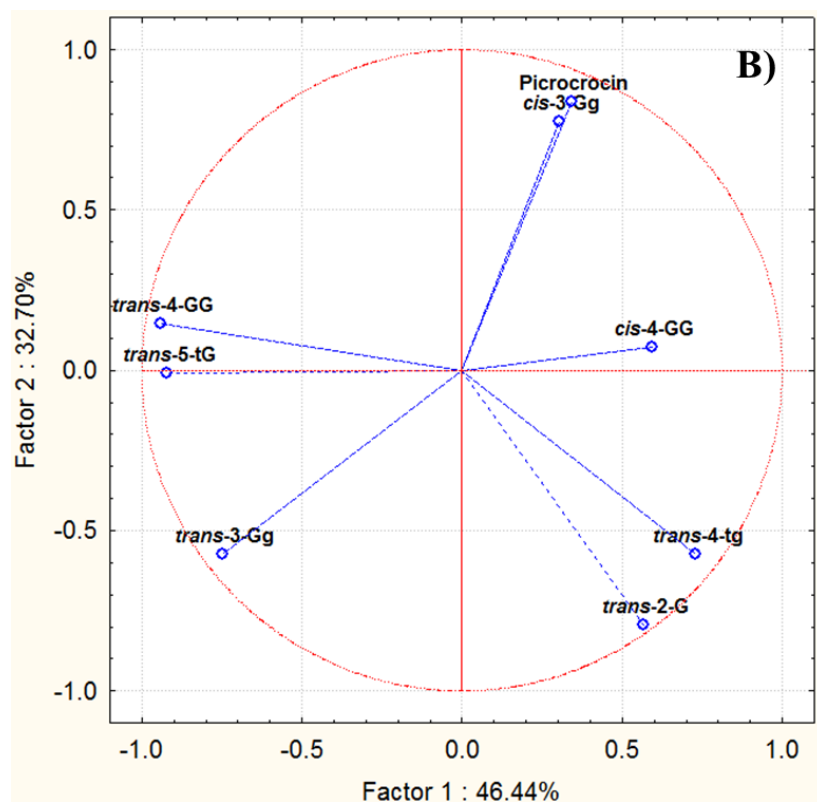

**Figure S3.** A) Principal Component Analysis (PCA) biplot of picrocrocin and crocin data obtained by HPLC-DAD for commercial saffron extracts (SE) and stigmas (SS) under study. B) Projection of the variables on the factor plane (factor 1 vs 2).

**Table S1.** Factor loadings for the PCA analysis considering as variables the major crocins and total *cis*- and *trans*- crocins.

|                    | Factor 1  | Factor 2  |
|--------------------|-----------|-----------|
| <i>trans</i> -5-tG | -0.518892 | 0.711446  |
| <i>trans</i> -4-GG | -0.839354 | -0.141232 |
| <i>trans</i> -4-tg | 0.817051  | -0.410951 |
| <i>trans</i> -3-Gg | -0.502340 | 0.414796  |
| <i>cis</i> -4-GG   | 0.659968  | 0.543370  |
| <i>cis</i> -3-Gg   | 0.184564  | 0.840699  |
| <i>trans</i> -2-G  | 0.878292  | -0.193775 |
| Total <i>trans</i> | -0.953207 | -0.236862 |
| Total <i>cis</i>   | 0.953447  | 0.236404  |

**Table S2.** Total crocin concentrations (mg g<sup>-1</sup>) of saffron extracts (SE), raw saffron stigmas (SS) and gardenia extract (GE).

| ID   | Total crocins |       |
|------|---------------|-------|
| SE1  | Mean          | 46.5  |
|      | RSD           | 4.85  |
| SE2  | Mean          | 44.0  |
|      | RSD           | 3.57  |
| SE3  | Mean          | 42.7  |
|      | RSD           | 2.59  |
| SE4  | Mean          | 46.8  |
|      | RSD           | 1.45  |
| SE5  | Mean          | 46.5  |
|      | RSD           | 0.25  |
| SE6  | Mean          | 42.2  |
|      | RSD           | 4.17  |
| SE7  | Mean          | 46.1  |
|      | RSD           | 3.59  |
| SE8  | Mean          | 45.5  |
|      | RSD           | 3.01  |
| SE9  | Mean          | 47.1  |
|      | RSD           | 4.43  |
| SE10 | Mean          | 47.2  |
|      | RSD           | 2.85  |
| SE11 | Mean          | 35.6  |
|      | RSD           | 4.09  |
| SE12 | Mean          | 188.1 |
|      | RSD           | 5.21  |
| SE13 | Mean          | 23.8  |
|      | RSD           | 2.49  |
| SE14 | Mean          | 146.3 |
|      | RSD           | 5.62  |
| SE15 | Mean          | 37.4  |
|      | RSD           | 3.51  |
| SE16 | Mean          | 8.2   |
|      | RSD           | 0.79  |
| SE17 | Mean          | 66.5  |
|      | RSD           | 4.72  |
| SE18 | Mean          | 37.9  |
|      | RSD           | 2.26  |
| SE19 | Mean          | 35.8  |
|      | RSD           | 3.52  |
| SE20 | Mean          | 52.7  |
|      | RSD           | 3.13  |
| SE21 | Mean          | 54.6  |
|      | RSD           | 2.49  |
| SS1  | Mean          | 144.3 |

|     |      |       |
|-----|------|-------|
|     | RSD  | 0.68  |
| SS2 | Mean | 155.5 |
|     | RSD  | 0.36  |
| SS3 | Mean | 155.3 |
|     | RSD  | 3.42  |
| SS4 | Mean | 166.4 |
|     | RSD  | 2.21  |
| SS5 | Mean | 163.4 |
|     | RSD  | 2.71  |
| SS6 | Mean | 155.2 |
|     | RSD  | 1.95  |
| GE1 | Mean | 228.7 |
|     | RSD  | 3.10  |

Table S3. Factor loadings for the PCA analysis considering as variables the major crocins and picrocrocin.

|                    | Factor 1  | Factor 2  |
|--------------------|-----------|-----------|
| <i>trans</i> -5-tG | -0.921072 | -0.008428 |
| <i>trans</i> -4-GG | -0.943208 | 0.145159  |
| <i>trans</i> -4-tg | 0.729629  | -0.571789 |
| <i>trans</i> -3-Gg | -0.749598 | -0.571766 |
| <i>cis</i> -4-GG   | 0.593166  | 0.071111  |
| <i>cis</i> -3-Gg   | 0.305115  | 0.777226  |
| <i>trans</i> -2-G  | 0.565910  | -0.793205 |
| Picrocrocin        | 0.342776  | 0.838191  |



**Table S4.** Individual crocin isomers content (% of total crocins), *trans/cis* and *trans*-4-GG/Picrocrocin (T4/P) ratios of affron® extract samples from different batches.

|                | <i>trans</i> -5-tG | <i>trans</i> -4-GG | <i>trans</i> -4-tg | <i>trans</i> -3-Gg | <i>cis</i> -4-GG | <i>cis</i> -3-Gg | <i>trans</i> -2-G | total <i>trans</i> - | total <i>cis</i> - | <i>trans/cis</i> | T4/P |
|----------------|--------------------|--------------------|--------------------|--------------------|------------------|------------------|-------------------|----------------------|--------------------|------------------|------|
| Mean values, % | 0.93               | 47.76              | 2.21               | 18.41              | 7.66             | 3.31             | 8.59              | 83.79                | 16.22              | 5.59             | 0.60 |
| Maximum        | 1.03               | 51.61              | 3.34               | 20.50              | 9.37             | 4.72             | 10.15             | 87.92                | 20.36              | 7.26             | 0.75 |
| Minimum        | 0.76               | 43.91              | 1.07               | 16.32              | 5.94             | 1.90             | 7.03              | 79.65                | 12.08              | 3.91             | 0.49 |
